# Supplementary material for: Graphene oxide and laponite composite films with high oxygen-barrier properties
Source: Royal Society of Chemistry journal article supplement (doi:10.1039/c4nr03429e), 2014-07-07
Supplement: c4nr03429e1.pdf [file c4nr03429e1.pdf]

## Supporting Information

# Graphene Oxide and Laponite Composite Films with High Oxygen-Barrier Properties

JongTae Yoo,<sup>†ab</sup> Sang Bong Lee,<sup>†a</sup> Chang Kee Lee,<sup>a</sup> Sung Wook Hwang,<sup>a</sup> ChaeRin Kim,<sup>b</sup>

Tsuyohiko Fujigaya,<sup>bc</sup> Naotoshi Nakashima,<sup>\*bc</sup> and Jin Kie Shim<sup>\*a</sup>

<sup>a</sup> Korea Packaging Center, Korea Institute of Industrial Technology, Ojeong-gu, Bucheon 421-742, South Korea

<sup>b</sup> Department of Applied Chemistry, Graduate School of Engineering, Kyushu University,

744 Motooka, Nishi-ku, Fukuoka 819-0395, Japan

<sup>c</sup> International Institute for Carbon-Neutral Energy Research (I2CNER), Kyushu University,

744 Motooka, Nishi-ku, Fukuoka 819-0395, Japan

<sup>†</sup> These authors contributed equally to this work.

\* Corresponding author. E-mail: nakashima-tcm@mail.cstm.kyushu-u.ac.jp (N. N.); jkshim@kitech.re.kr (J. S.)

**Table S1** Content ratios and pH of the mixed solutions composed of the GO and LN.

|                                          | Mixing ratios (v/v)* |     | Content ratios (wt/wt) |      | pH of solutions |
|------------------------------------------|----------------------|-----|------------------------|------|-----------------|
|                                          | GO                   | LN  | GO                     | LN   |                 |
| <b>GO</b>                                | 2.0                  | 0   | 100                    | 0    | 2.3             |
| <b>GO<sub>1.9</sub>/LN<sub>0.1</sub></b> | 1.9                  | 0.1 | 82.6                   | 17.4 | 2.9             |
| <b>GO<sub>1.7</sub>/LN<sub>0.3</sub></b> | 1.7                  | 0.3 | 58.6                   | 41.4 | 4.4             |
| <b>GO<sub>1.5</sub>/LN<sub>0.5</sub></b> | 1.5                  | 0.5 | 42.9                   | 57.1 | 5.7             |
| <b>LN</b>                                | 0                    | 2.0 | 0                      | 100  | 9.8             |

\* Solute contents of the solutions: GO of 0.5 (wt/v) % and laponite of 2 (wt/wt) %

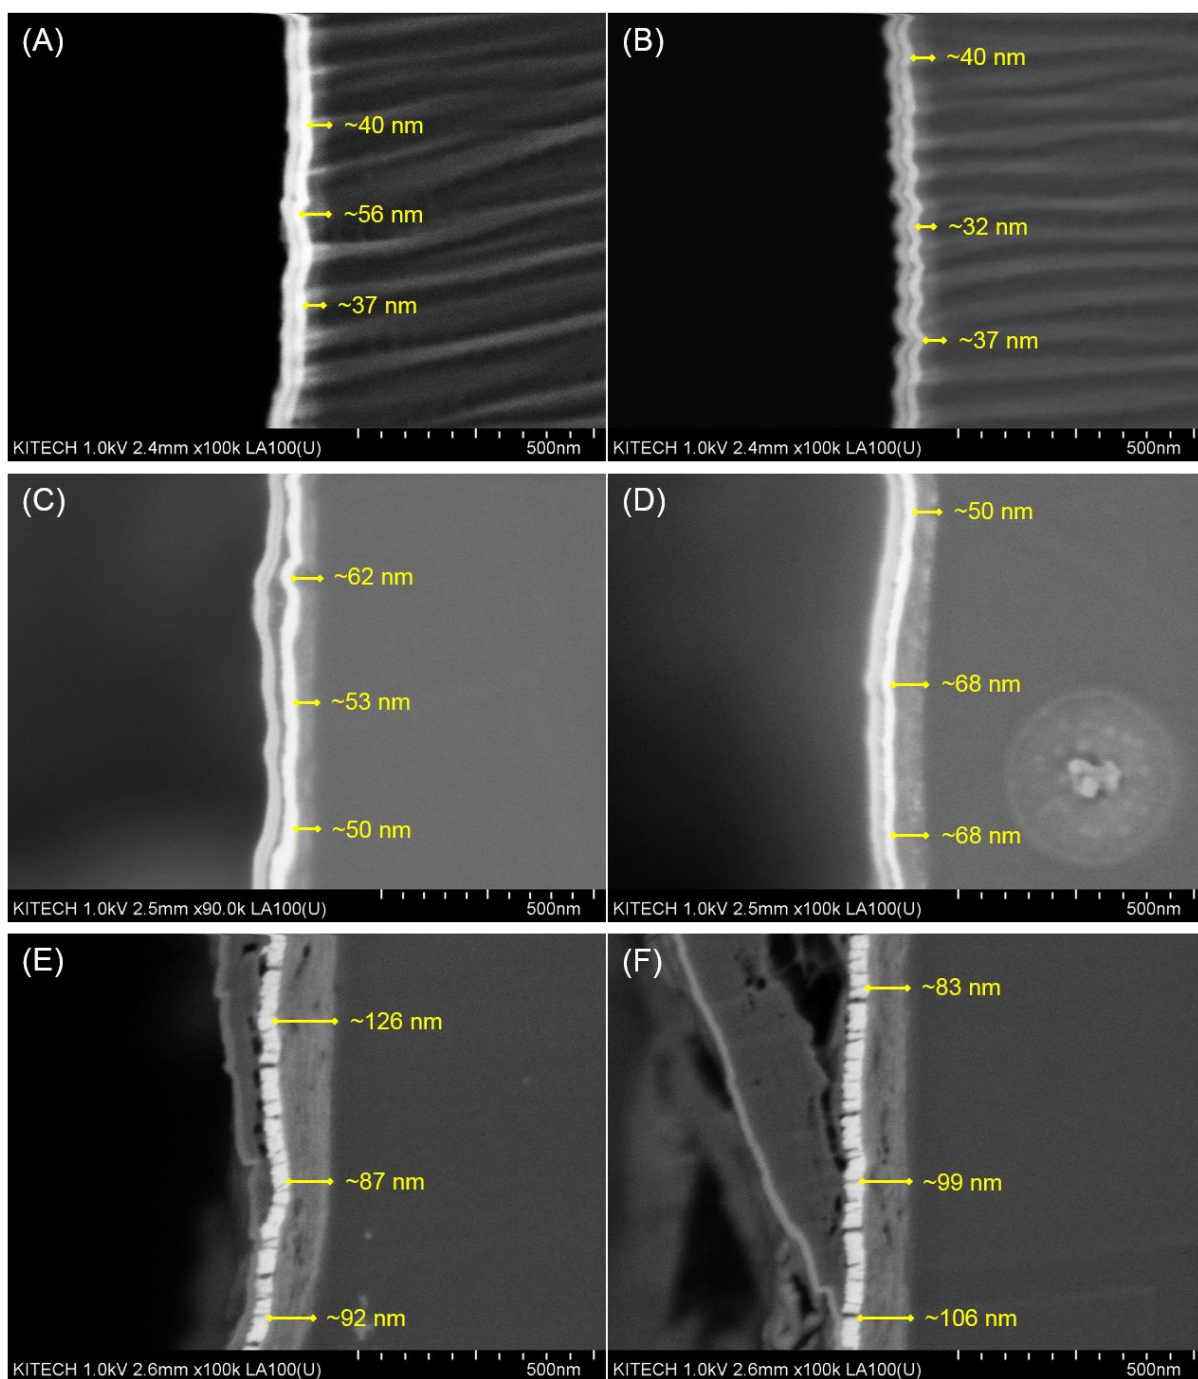

**Fig. S1** Cross-sectional SEM images of the (A and B) GO alone, (B and C) GO<sub>1.9</sub>/LN<sub>0.1</sub>, (C and D) GO<sub>1.5</sub>/LN<sub>0.5</sub>-coated PET films.

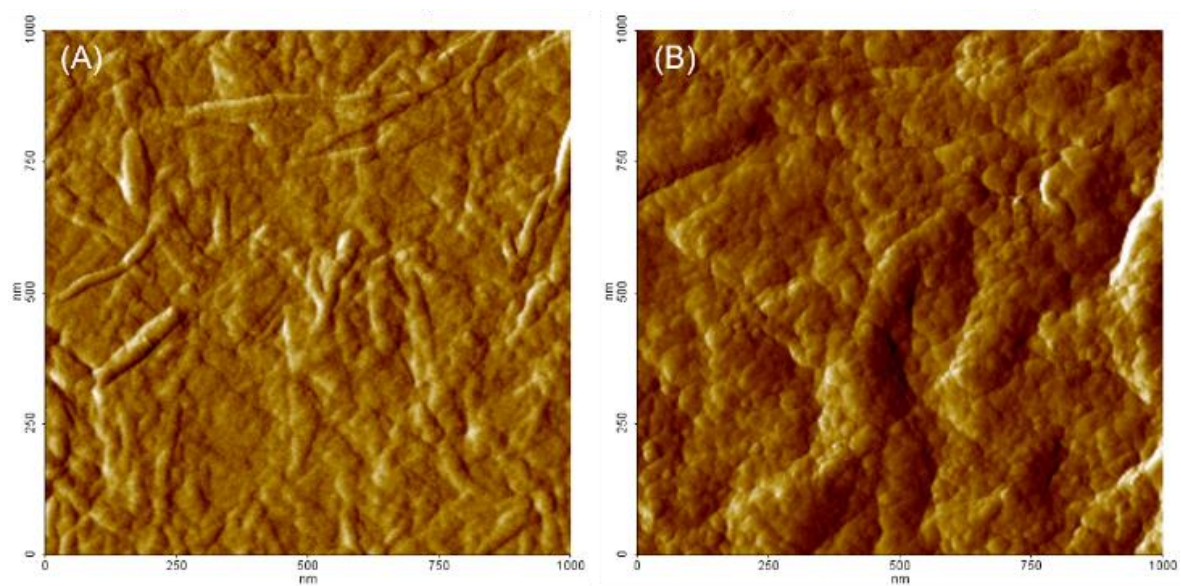

**Fig. S2** AFM images of upper surfaces of the (A) GO alone and (B)  $\text{GO}_{1.9}/\text{LN}_{0.1}$ .
